# Supplementary material
Source: PubMed Central journal article supplement (PMC9552248)
Supplement: NIHMS1840884-supplement-1.pdf [file NIHMS1840884-supplement-1.pdf]

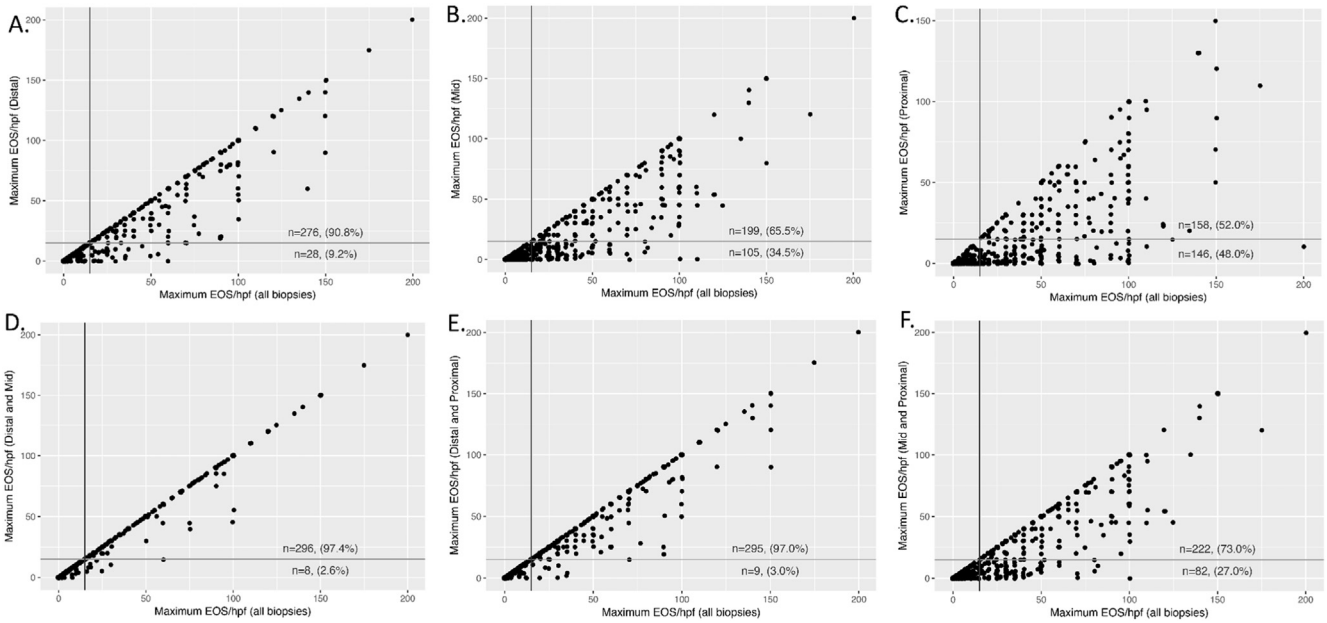

**Supplementary Figure 1.** Comparison of peak eosinophilia from individual vs all sites and 2-site combinations vs all sites. N = 304 endoscopies with active EoE. (A) Distal vs all, (B) mid vs all, (C) proximal vs all, (D) distal and mid vs all, (E) distal and proximal vs all, (F) mid and proximal vs all. Three-site combination shown on x-axis; individual and 2-site combinations shown on y-axis. Horizontal line at y = 15 eos/hpf to denote which endoscopies would be missed without 3-site combination.

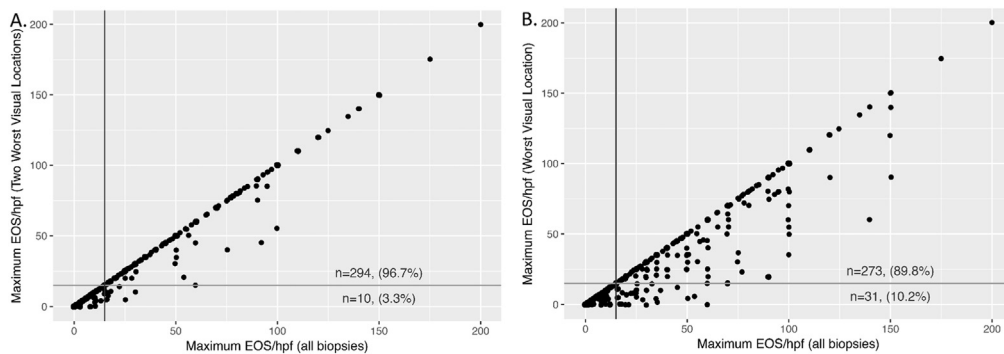

**Supplementary Figure 2.** Comparison of peak eosinophilia from 3-site combination vs visually abnormal site(s). N = 304 endoscopies with active EoE. (A) Two worst visual vs all, (B) worst visual vs all. Three-site combination shown on x-axis; peak eosinophils from individual and 2 worst visual locations shown on y-axis. Horizontal line at y = 15 eos/hpf to denote which endoscopies would be missed without 3-site combination.

**Supplementary Table 1.** Endoscopic Findings, Medications, and Medical History of 217 EoE Patients

|                                 |            |
|---------------------------------|------------|
| Endoscopic findings, n (%)      |            |
| Edema                           | 117 (54)   |
| Exudate                         | 75 (35)    |
| Furrows                         | 134 (62)   |
| Rings                           | 61 (28)    |
| Stricture                       | 2 (1)      |
| Medications, n (%)              |            |
| Inhaled steroid                 | 41 (18.9)  |
| Intranasal steroid              | 32 (14.7)  |
| Proton pump inhibitor           | 174 (80.2) |
| Swallowed "topical" steroids    | 53 (24.4)  |
| Medical history, n (%)          |            |
| Asthma                          | 84 (38.7)  |
| Celiac disease                  | 4 (1.9)    |
| Conjunctivitis                  | 19 (8.9)   |
| Drug allergy                    | 41 (18.9)  |
| Eczema                          | 90 (41.5)  |
| Food allergy                    | 91 (42)    |
| Gastroesophageal reflux disease | 41 (18.9)  |
| Inflammatory bowel disease      | 1 (0.5)    |
| Rhinitis                        | 126 (58.1) |

**Supplementary Table 2.** Median Eos/hpf, Sensitivity, Negative Predictive Value, and Accuracy for Identification of Active EoE Stratified by Swallowed Steroid Use

| Esophagus site                     | Eos/hpf, median [interquartile range] | Sensitivity (%) | Negative predictive value (%) | Accuracy (%) |
|------------------------------------|---------------------------------------|-----------------|-------------------------------|--------------|
| On swallowed steroid (n = 28)      |                                       |                 |                               |              |
| Distal/mid/proximal                | 34 30–90                              | 100             | 100                           | 100          |
| Distal/mid                         | 34 25–50                              | 96.4            | 95.2                          | 97.9         |
| Distal/proximal                    | 32 23–50                              | 96.4            | 95.2                          | 97.9         |
| Mid/proximal                       | 10 5–30                               | 46.4            | 67.0                          | 85.0         |
| Distal                             | 32 23–50                              | 92.9            | 91.3                          | 95.9         |
| Mid                                | 10 5–30                               | 35.7            | 67.3                          | 72.3         |
| Proximal                           | 4 1–15                                | 57.6            | 66.1                          | 70.2         |
| Not on swallowed steroid (n = 139) |                                       |                 |                               |              |
| Distal/mid/proximal                | 55 25–50                              | 100             | 100                           | 100          |
| Distal/mid                         | 50 30–85                              | 97.1            | 89.7                          | 97.7         |
| Distal/proximal                    | 45 25–80                              | 99.3            | 97.0                          | 99.4         |
| Mid/proximal                       | 45 19–70                              | 78.4            | 69.4                          | 75.8         |
| Distal                             | 40 25–80                              | 91.3            | 78.2                          | 93.4         |
| Mid                                | 40 11–60                              | 70.5            | 63.7                          | 80.6         |
| Proximal                           | 20 5–30                               | 28.6            | 60.4                          | 74.2         |
